# Supplementary material for: Three resorcin[4]arene-based lanthanide-coordination polymers with multifunctional photoluminescence sensing properties
Source: Royal Society of Chemistry journal article supplement (doi:10.1039/c8ra09777a), 2019-01-01
Supplement: c8ra09777a1.pdf [file c8ra09777a1.pdf]

## Electronic supplementary information (ESI)

### Three resorcin[4]arene-based lanthanide-coordination polymers for multifunctional photoluminescence sensing properties

Hang Zhang,\*<sup>a</sup> Jia-Chen Wang,<sup>a</sup> Wei Jiang<sup>b</sup> and Si-Si Zhao\*<sup>a</sup>

<sup>a</sup> *Institute of Catalysis for Energy and Environment, College of Chemistry & Chemical Engineering,  
Shenyang Normal University, Shenyang, 110034, P. R. China*

<sup>b</sup> *College of Environmental Science and Engineering, Jilin Normal University, Siping, 136000, P. R.  
China*

E-mail: zhangh@syu.edu.cn (H. Zhang), zhaoss@syu.edu.cn (S-S Zhao)

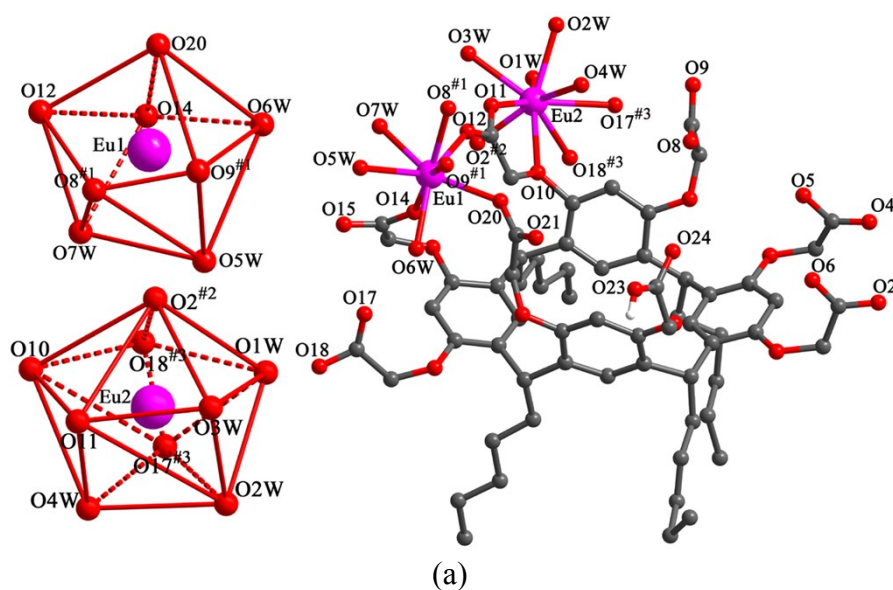

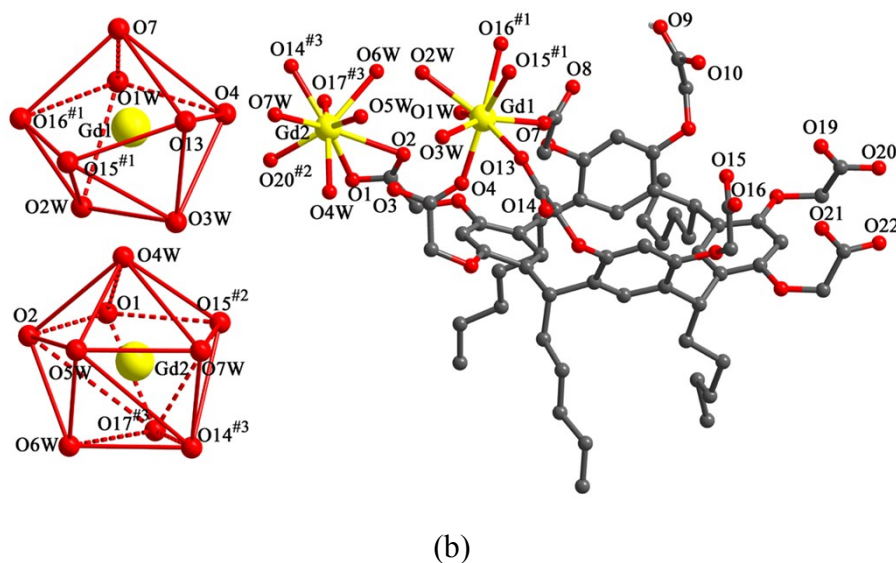

Fig. S1. Coordination environments of Ln<sup>3+</sup> cations in **2** (a) and **3** (b).

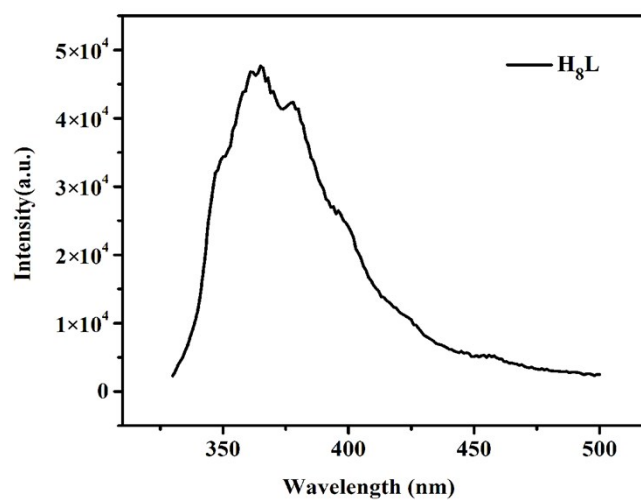

Fig. S2. Solid state emission spectra of H<sub>8</sub>L

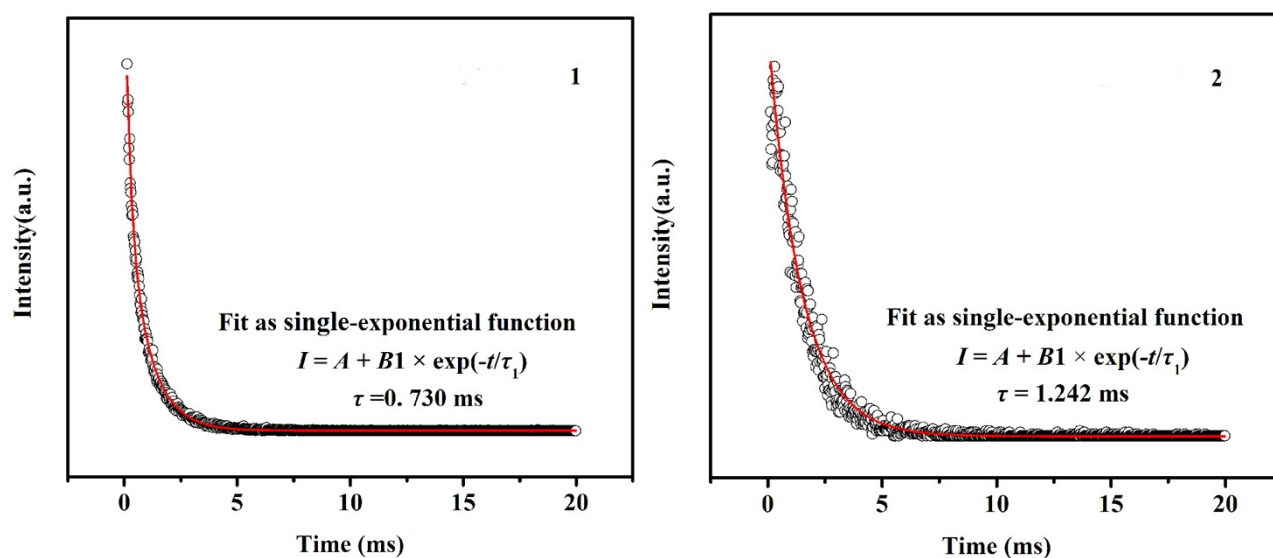

Fig. S3. Decay curves of **1** and **2** recorded at 543 nm for Tb<sup>3+</sup> and 614 nm for Eu<sup>3+</sup>.

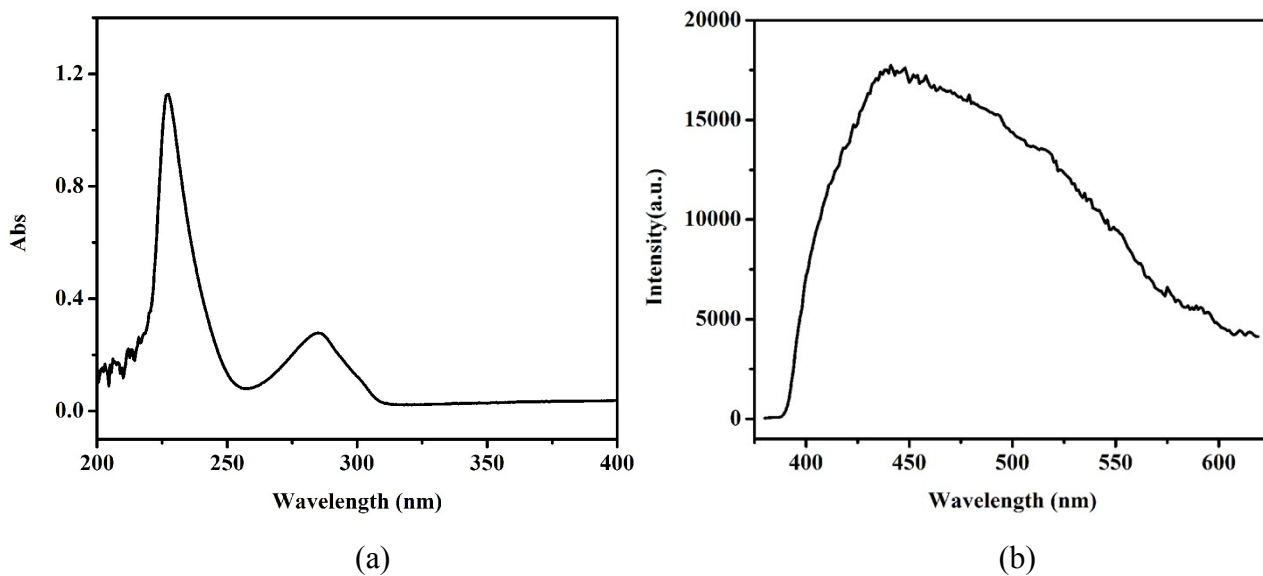

**Fig. S4.** (a) UV-vis absorption spectrum of **3** in methanol solution. (b) Solid state phosphorescent spectrum of **3** at 77 K.

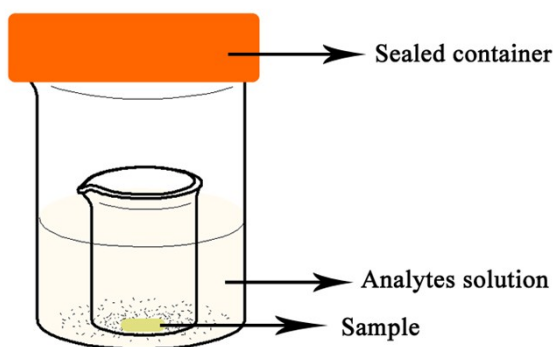

**Fig. S5.** Diagram showing the gas sensing equipment for DMF vapor.

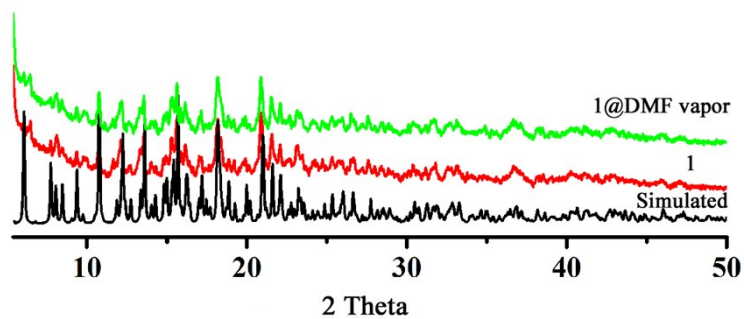

(a)

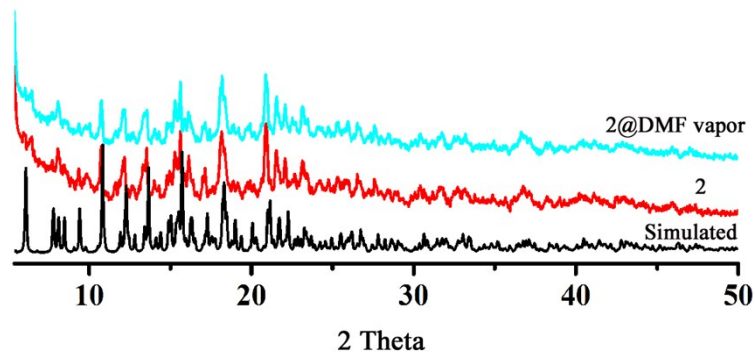

(b)

**Fig. S6.** PXRD patterns of **1** (a) and **2** (b) treated in DMF vapor.

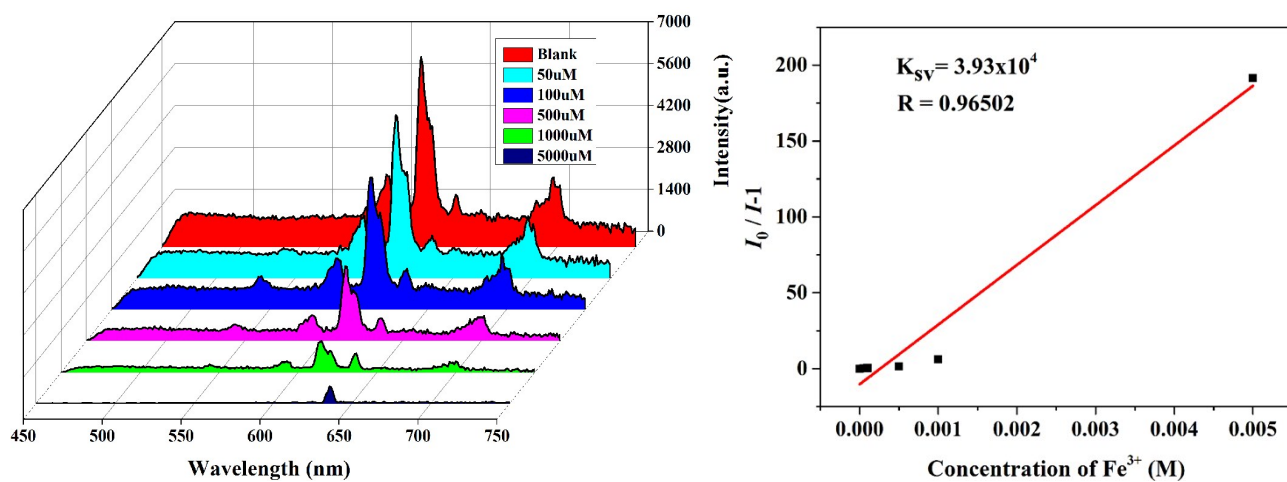

**Fig. S7.** Emission spectra and linear relationship for **2** in aqueous solution of different concentrations of  $\text{Fe}^{3+}$

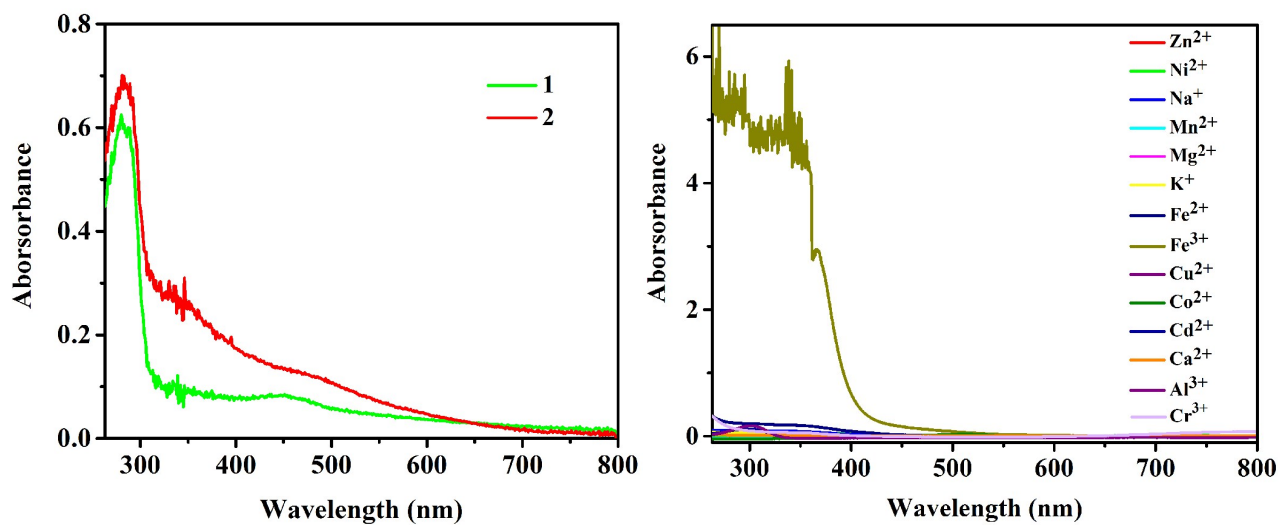

**Fig. S8.** UV-Vis absorption spectra of **1**, **2** and various metal cations in aqueous solutions.

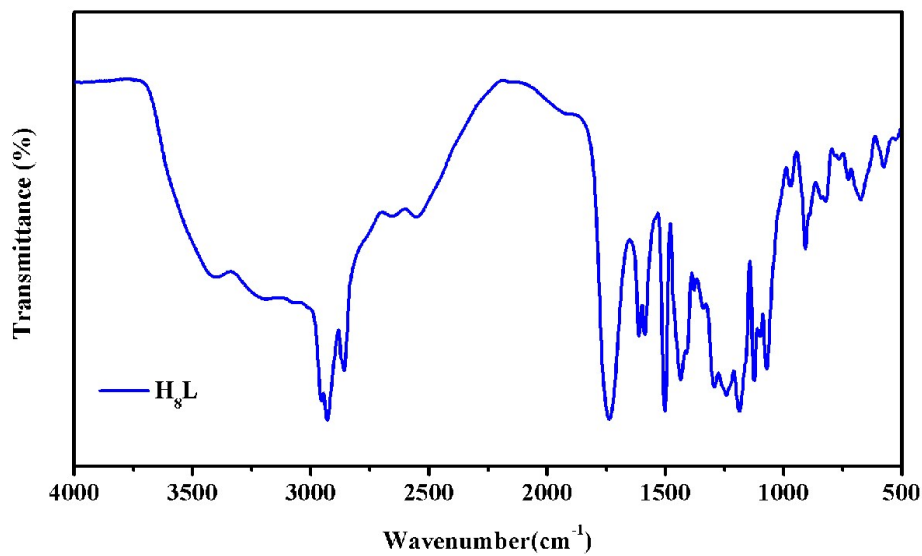

**Fig. S9.** FT-IR spectrum of  $H_8L$ .

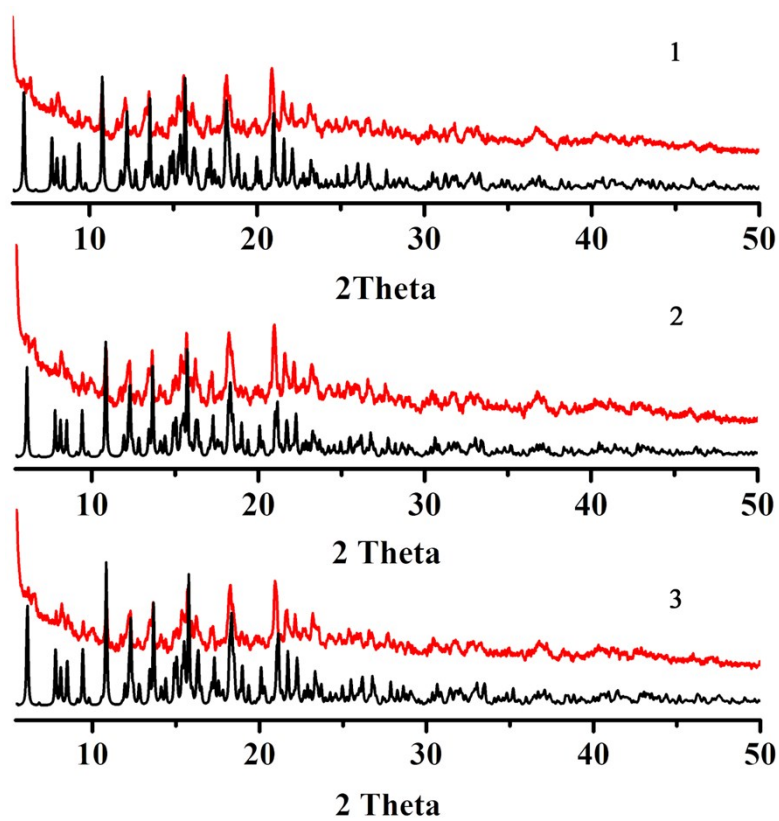

**Fig. S10.** Simulated and experimental PXR D patterns of **1-3**.

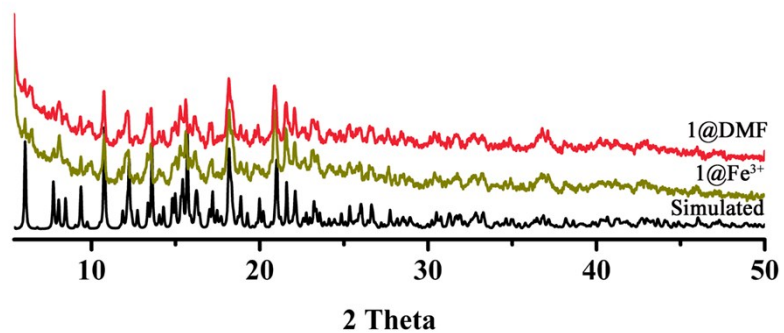

(a)

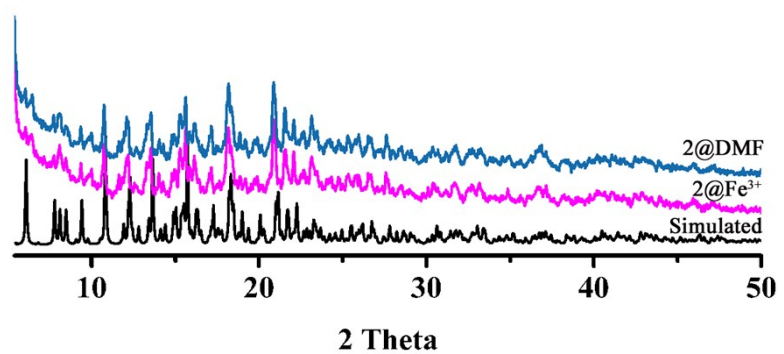

(b)

**Fig. S12.** PXRD patterns of **1** (a) and **2** (b) treated in DMF and  $\text{Fe}^{3+}$  solution.

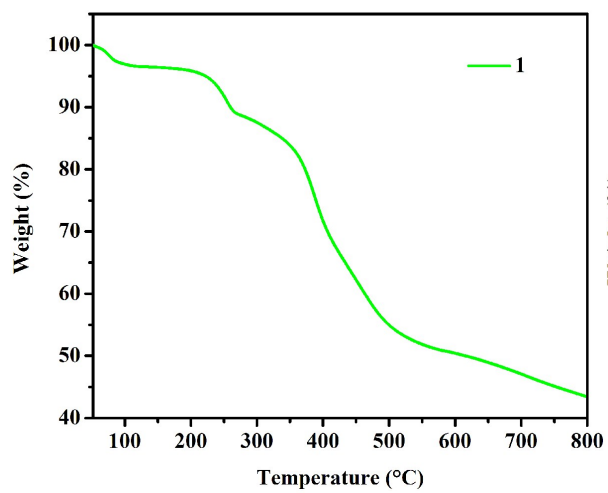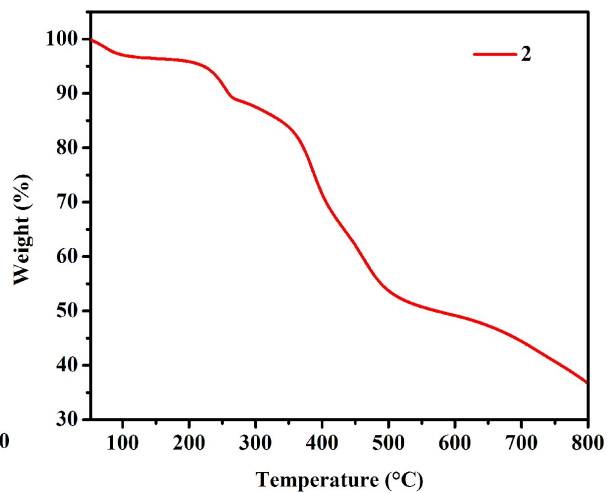

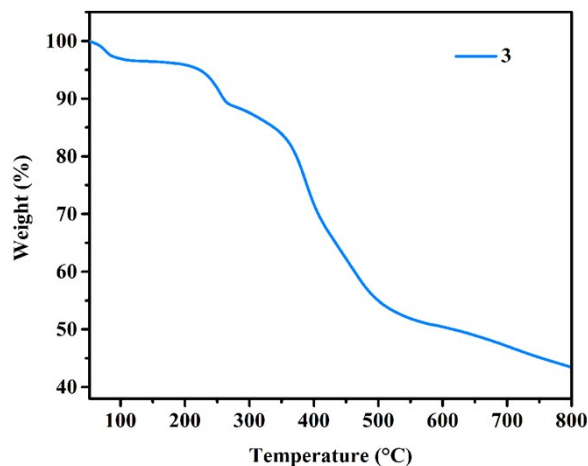

**Fig. S13.** TG curves of **1-3**. The weight loss, corresponding to the  $(\text{CH}_3)_2\text{NH}_2^+$  cation and waters, is observed before 275 °C for **1** (found: 11.31%, calcd: 11.91%), 279 °C for **2** (found: 11.50%, calcd: 12.01%), and 280 °C for **3** (found: 11.36%, calcd: 11.94%), thereafter, the frameworks began to decompose.

**Table S1** Crystal data and structure refinements for **1-3**.

|                          | <b>1</b>                                              | <b>2</b>                                              | <b>3</b>                                              |
|--------------------------|-------------------------------------------------------|-------------------------------------------------------|-------------------------------------------------------|
| Formula                  | $\text{C}_{66}\text{H}_{94}\text{Tb}_2\text{NO}_{33}$ | $\text{C}_{66}\text{H}_{94}\text{Eu}_2\text{NO}_{33}$ | $\text{C}_{66}\text{H}_{94}\text{Gd}_2\text{NO}_{33}$ |
| <i>Mr</i>                | 1747.26                                               | 1733.34                                               | 1743.92                                               |
| Space group              | <i>P</i> -1                                           | <i>P</i> -1                                           | <i>P</i> -1                                           |
| <i>a</i> /Å              | 11.6240(5)                                            | 11.6030(7)                                            | 11.573(5)                                             |
| <i>b</i> /Å              | 14.8640(9)                                            | 14.7990(10)                                           | 14.796(5)                                             |
| <i>c</i> /Å              | 22.1860(16)                                           | 22.0270(14)                                           | 22.058(5)                                             |
| $\alpha$ /°              | 97.698(5)                                             | 97.853(6)                                             | 97.762(5)                                             |
| $\beta$ /°               | 92.368(5)                                             | 92.450(5)                                             | 92.518(5)                                             |
| $\gamma$ /°              | 98.312(4)                                             | 98.272(6)                                             | 98.243(5)                                             |
| <i>V</i> /Å <sup>3</sup> | 3751.6(4)                                             | 3700.3(4)                                             | 3696(2)                                               |

|                                                            |        |        |        |
|------------------------------------------------------------|--------|--------|--------|
| <i>Z</i>                                                   | 2      | 2      | 2      |
| <i>D<sub>c</sub></i> (g/cm <sup>3</sup> )                  | 1.547  | 1.556  | 1.567  |
| GOF on <i>F</i> <sup>2</sup>                               | 1.107  | 1.113  | 1.073  |
| <i>R</i> 1 <sup><i>a</i></sup> [ <i>I</i> >2σ( <i>I</i> )] | 0.1461 | 0.1390 | 0.1594 |
| <i>wR</i> 2 <sup><i>b</i></sup> (all data)                 | 0.3284 | 0.2958 | 0.3434 |
| <i>R</i> <sub>int</sub>                                    | 0.0856 | 0.0850 | 0.1271 |

$${}^a R_1 = \frac{\sum ||F_o| - |F_c||}{\sum |F_o|}, {}^b wR_2 = \left\{ \frac{\sum [w(F_o^2 - F_c^2)^2]}{\sum w(F_o^2)^2} \right\}^{1/2}.$$

**Table S2.** Selected bond distances (Å) and angles (°) for **1**.

|                                  |           |                                                |           |
|----------------------------------|-----------|------------------------------------------------|-----------|
| Tb(1)-O(3)                       | 2.306(16) | Tb(1)-O(7)                                     | 2.303(13) |
| Tb(1)-O(2)                       | 2.355(12) | Tb(1)-O(14) <sup>#1</sup>                      | 2.386(13) |
| Tb(1)-O(3W)                      | 2.428(14) | Tb(1)-O(1W)                                    | 2.401(16) |
| Tb(1)-O(2W)                      | 2.481(12) | Tb(1)-O(15) <sup>#1</sup>                      | 2.501(12) |
| Tb(2)-O(11)                      | 2.300(14) | Tb(2)-O(1) <sup>#2</sup>                       | 2.358(13) |
| Tb(2)-O(6) <sup>#3</sup>         | 2.392(15) | Tb(2)-O(4W)                                    | 2.401(13) |
| Tb(2)-O(6W)                      | 2.439(15) | Tb(2)-O(7W)                                    | 2.439(15) |
| Tb(2)-O(5W)                      | 2.491(12) | Tb(2)-O(17) <sup>#2</sup>                      | 2.607(12) |
| Tb(2)-O(5) <sup>#3</sup>         | 2.648(17) | O(3)-Tb(1)-O(7)                                | 94.0(5)   |
| O(3)-Tb(1)-O(2)                  | 78.7(5)   | O(7)-Tb(1)-O(2)                                | 78.1(4)   |
| O(3)-Tb(1)-O(14) <sup>#1</sup>   | 149.2(5)  | O(7)-Tb(1)-O(14) <sup>#1</sup>                 | 93.0(5)   |
| O(2)-Tb(1)-O(14) <sup>#1</sup>   | 73.5(5)   | O(3)-Tb(1)-O(3W)                               | 76.1(5)   |
| O(7)-Tb(1)-O(3W)                 | 79.3(4)   | O(2)-Tb(1)-O(3W)                               | 144.6(5)  |
| O(14) <sup>#1</sup> -Tb(1)-O(3W) | 134.7(4)  | O(3)-Tb(1)-O(1W)                               | 76.1(5)   |
| O(7)-Tb(1)-O(1W)                 | 147.3(5)  | O(2)-Tb(1)-O(1W)                               | 69.5(5)   |
| O(14) <sup>#1</sup> -Tb(1)-O(1W) | 81.9(5)   | O(3W)-Tb(1)-O(1W)                              | 126.3(5)  |
| O(3)-Tb(1)-O(2W)                 | 107.9(5)  | O(7)-Tb(1)-O(2W)                               | 140.3(4)  |
| O(2)-Tb(1)-O(2W)                 | 137.5(4)  | O(14) <sup>#1</sup> -Tb(1)-O(2W)               | 84.8(5)   |
| O(3W)-Tb(1)-O(2W)                | 74.7(4)   | O(1W)-Tb(1)-O(2W)                              | 71.6(5)   |
| O(3)-Tb(1)-O(15) <sup>#1</sup>   | 157.3(5)  | O(7)-Tb(1)-O(15) <sup>#1</sup>                 | 78.5(5)   |
| O(2)-Tb(1)-O(15) <sup>#1</sup>   | 119.7(4)  | O(14) <sup>#1</sup> -Tb(1)-O(15) <sup>#1</sup> | 53.3(4)   |



|                                               |          |                                               |          |
|-----------------------------------------------|----------|-----------------------------------------------|----------|
| O(3W)-Tb(1)-O(15) <sup>#1</sup>               | 81.5(4)  | O(1W)-Tb(1)-O(15) <sup>#1</sup>               | 121.2(5) |
| O(2W)-Tb(1)-O(15) <sup>#1</sup>               | 68.6(4)  | O(11)-Tb(2)-O(1) <sup>#2</sup>                | 83.7(5)  |
| O(11)-Tb(2)-O(6) <sup>#3</sup>                | 75.2(5)  | O(1) <sup>#2</sup> -Tb(2)-O(6) <sup>#3</sup>  | 130.2(5) |
| O(11)-Tb(2)-O(4W)                             | 147.5(5) | O(1) <sup>#2</sup> -Tb(2)-O(4W)               | 71.3(5)  |
| O(6) <sup>#3</sup> -Tb(2)-O(4W)               | 105.2(5) | O(11)-Tb(2)-O(6W)                             | 138.2(5) |
| O(1) <sup>#2</sup> -Tb(2)-O(6W)               | 103.9(5) | O(6) <sup>#3</sup> -Tb(2)-O(6W)               | 121.9(5) |
| O(4W)-Tb(2)-O(6W)                             | 70.1(5)  | O(11)-Tb(2)-O(7W)                             | 78.9(5)  |
| O(1) <sup>#2</sup> -Tb(2)-O(7W)               | 145.7(5) | O(6) <sup>#3</sup> -Tb(2)-O(7W)               | 73.6(5)  |
| O(4W)-Tb(2)-O(7W)                             | 133.1(5) | O(6W)-Tb(2)-O(7W)                             | 71.7(5)  |
| O(11)-Tb(2)-O(5W)                             | 74.6(5)  | O(1) <sup>#2</sup> -Tb(2)-O(5W)               | 67.9(4)  |
| O(6) <sup>#3</sup> -Tb(2)-O(5W)               | 142.0(4) | O(4W)-Tb(2)-O(5W)                             | 112.7(5) |
| O(6W)-Tb(2)-O(5W)                             | 70.8(4)  | O(7W)-Tb(2)-O(5W)                             | 78.4(5)  |
| O(17) <sup>#2</sup> -Tb(2)-O(5) <sup>#3</sup> | 93.5(4)  | O(11)-Tb(2)-O(17) <sup>#2</sup>               | 76.7(5)  |
| O(1) <sup>#2</sup> -Tb(2)-O(17) <sup>#2</sup> | 61.9(4)  | O(6) <sup>#3</sup> -Tb(2)-O(17) <sup>#2</sup> | 69.5(4)  |
| O(4W)-Tb(2)-O(17) <sup>#2</sup>               | 73.3(4)  | O(6W)-Tb(2)-O(17) <sup>#2</sup>               | 143.4(4) |
| O(7W)-Tb(2)-O(17) <sup>#2</sup>               | 139.8(5) | O(5W)-Tb(2)-O(17) <sup>#2</sup>               | 124.0(4) |
| O(5W)-Tb(2)-O(5) <sup>#3</sup>                | 143.4(4) | O(11)-Tb(2)-O(5) <sup>#3</sup>                | 126.1(5) |
| O(1) <sup>#2</sup> -Tb(2)-O(5) <sup>#3</sup>  | 137.6(4) | O(6) <sup>#3</sup> -Tb(2)-O(5) <sup>#3</sup>  | 52.3(4)  |
| O(4W)-Tb(2)-O(5) <sup>#3</sup>                | 68.6(5)  | O(6W)-Tb(2)-O(5) <sup>#3</sup>                | 74.7(5)  |
| O(7W)-Tb(2)-O(5) <sup>#3</sup>                | 75.9(5)  |                                               |          |

Symmetry transformations used to generate equivalent atoms: <sup>#1</sup> -x+1, -y+2, -z; <sup>#2</sup> x, y-1, z; <sup>#3</sup> x+1, y-1, z.

**Table S3.** Selected bond distances (Å) and angles (°) for **2**.

|                                |           |                                |           |
|--------------------------------|-----------|--------------------------------|-----------|
| Eu(1)-O(20)                    | 2.316(12) | Eu(1)-O(14)                    | 2.321(15) |
| Eu(1)-O(12)                    | 2.361(10) | Eu(1)-O(8) <sup>#1</sup>       | 2.381(13) |
| Eu(1)-O(7W)                    | 2.425(15) | Eu(1)-O(6W)                    | 2.429(11) |
| Eu(1)-O(9) <sup>#1</sup>       | 2.498(12) | Eu(1)-O(5W)                    | 2.525(13) |
| Eu(2)-O(2) <sup>#2</sup>       | 2.311(14) | Eu(2)-O(11)                    | 2.403(12) |
| Eu(2)-O(18) <sup>#3</sup>      | 2.407(12) | Eu(2)-O(2W)                    | 2.460(13) |
| Eu(2)-O(4W)                    | 2.464(15) | Eu(2)-O(1W)                    | 2.473(14) |
| Eu(2)-O(3W)                    | 2.494(12) | Eu(2)-O(17) <sup>#3</sup>      | 2.601(14) |
| Eu(2)-O(10)                    | 2.605(11) | O(20)-Eu(1)-O(14)              | 94.7(5)   |
| O(20)-Eu(1)-O(12)              | 78.1(4)   | O(14)-Eu(1)-O(12)              | 79.4(5)   |
| O(20)-Eu(1)-O(8) <sup>#1</sup> | 92.7(4)   | O(14)-Eu(1)-O(8) <sup>#1</sup> | 150.1(5)  |

|                                                |          |                                              |          |
|------------------------------------------------|----------|----------------------------------------------|----------|
| O(12)-Eu(1)-O(8) <sup>#1</sup>                 | 73.9(4)  | O(20)-Eu(1)-O(7W)                            | 147.7(5) |
| O(14)-Eu(1)-O(7W)                              | 77.0(5)  | O(12)-Eu(1)-O(7W)                            | 69.7(5)  |
| O(8) <sup>#1</sup> -Eu(1)-O(7W)                | 81.3(5)  | O(20)-Eu(1)-O(6W)                            | 79.0(4)  |
| O(14)-Eu(1)-O(6W)                              | 75.0(4)  | O(12)-Eu(1)-O(6W)                            | 143.9(4) |
| O(8) <sup>#1</sup> -Eu(1)-O(6W)                | 134.8(4) | O(7W)-Eu(1)-O(6W)                            | 126.9(4) |
| O(20)-Eu(1)-O(9) <sup>#1</sup>                 | 77.7(4)  | O(14)-Eu(1)-O(9) <sup>#1</sup>               | 156.8(4) |
| O(12)-Eu(1)-O(9) <sup>#1</sup>                 | 119.4(4) | O(8) <sup>#1</sup> -Eu(1)-O(9) <sup>#1</sup> | 52.9(4)  |
| O(7W)-Eu(1)-O(9) <sup>#1</sup>                 | 120.6(5) | O(6W)-Eu(1)-O(9) <sup>#1</sup>               | 82.0(4)  |
| O(20)-Eu(1)-O(5W)                              | 141.7(4) | O(14)-Eu(1)-O(5W)                            | 107.3(5) |
| O(12)-Eu(1)-O(5W)                              | 135.7(4) | O(8) <sup>#1</sup> -Eu(1)-O(5W)              | 83.6(4)  |
| O(7W)-Eu(1)-O(5W)                              | 69.5(5)  | O(6W)-Eu(1)-O(5W)                            | 77.1(4)  |
| O(9) <sup>#1</sup> -Eu(1)-O(5W)                | 69.7(4)  | O(2) <sup>#2</sup> -Eu(2)-O(11)              | 82.8(5)  |
| O(2) <sup>#2</sup> -Eu(2)-O(18) <sup>#3</sup>  | 76.1(5)  | O(11)-Eu(2)-O(18) <sup>#3</sup>              | 130.6(4) |
| O(2) <sup>#2</sup> -Eu(2)-O(2W)                | 136.1(5) | O(11)-Eu(2)-O(2W)                            | 104.1(4) |
| O(18) <sup>#3</sup> -Eu(2)-O(2W)               | 122.1(4) | O(2) <sup>#2</sup> -Eu(2)-O(4W)              | 147.9(5) |
| O(11)-Eu(2)-O(4W)                              | 71.5(5)  | O(18) <sup>#3</sup> -Eu(2)-O(4W)             | 106.3(5) |
| O(2W)-Eu(2)-O(4W)                              | 70.7(5)  | O(2) <sup>#2</sup> -Eu(2)-O(1W)              | 78.4(5)  |
| O(11)-Eu(2)-O(1W)                              | 144.5(5) | O(18) <sup>#3</sup> -Eu(2)-O(1W)             | 73.1(5)  |
| O(2W)-Eu(2)-O(1W)                              | 71.4(5)  | O(4W)-Eu(2)-O(1W)                            | 133.5(5) |
| O(2) <sup>#2</sup> -Eu(2)-O(3W)                | 73.1(5)  | O(11)-Eu(2)-O(3W)                            | 67.8(4)  |
| O(18) <sup>#3</sup> -Eu(2)-O(3W)               | 141.1(4) | O(2W)-Eu(2)-O(3W)                            | 70.1(4)  |
| O(4W)-Eu(2)-O(3W)                              | 112.4(5) | O(1W)-Eu(2)-O(3W)                            | 78.0(5)  |
| O(2) <sup>#2</sup> -Eu(2)-O(17) <sup>#3</sup>  | 126.5(5) | O(11)-Eu(2)-O(17) <sup>#3</sup>              | 138.5(5) |
| O(18) <sup>#3</sup> -Eu(2)-O(17) <sup>#3</sup> | 51.8(4)  | O(2W)-Eu(2)-O(17) <sup>#3</sup>              | 75.9(4)  |
| O(4W)-Eu(2)-O(17) <sup>#3</sup>                | 69.6(5)  | O(1W)-Eu(2)-O(17) <sup>#3</sup>              | 75.9(4)  |
| O(3W)-Eu(2)-O(17) <sup>#3</sup>                | 142.2(4) | O(2) <sup>#2</sup> -Eu(2)-O(10)              | 77.1(4)  |
| O(11)-Eu(2)-O(10)                              | 61.6(4)  | O(18) <sup>#3</sup> -Eu(2)-O(10)             | 70.4(4)  |
| O(2W)-Eu(2)-O(10)                              | 144.6(4) | O(4W)-Eu(2)-O(10)                            | 73.9(4)  |
| O(1W)-Eu(2)-O(10)                              | 139.8(5) | O(3W)-Eu(2)-O(10)                            | 123.4(4) |
| O(17) <sup>#3</sup> -Eu(2)-O(10)               | 93.9(4)  |                                              |          |

Symmetry transformations used to generate equivalent atoms: <sup>#1</sup> -x+2, -y, -z+1; <sup>#2</sup> x, y+1, z; <sup>#3</sup> x+1, y, z.

**Table S4.** Selected bond distances (Å) and angles (°) for **3**.

|            |           |            |           |
|------------|-----------|------------|-----------|
| Gd(1)-O(7) | 2.291(15) | Gd(1)-O(4) | 2.309(17) |
|------------|-----------|------------|-----------|

|                                  |           |                                                |           |
|----------------------------------|-----------|------------------------------------------------|-----------|
| Gd(1)-O(13)                      | 2.361(14) | Gd(1)-O(15) <sup>#1</sup>                      | 2.370(15) |
| Gd(1)-O(3W)                      | 2.397(18) | Gd(1)-O(1W)                                    | 2.432(16) |
| Gd(1)-O(2W)                      | 2.481(15) | Gd(1)-O(16) <sup>#1</sup>                      | 2.511(14) |
| Gd(2)-O(20) <sup>#2</sup>        | 2.301(15) | Gd(2)-O(14) <sup>#3</sup>                      | 2.378(15) |
| Gd(2)-O(1)                       | 2.386(16) | Gd(2)-O(4W)                                    | 2.420(16) |
| Gd(2)-O(5W)                      | 2.436(18) | Gd(2)-O(6W)                                    | 2.444(18) |
| Gd(2)-O(7W)                      | 2.466(14) | Gd(2)-O(17) <sup>#3</sup>                      | 2.581(13) |
| Gd(2)-O(2)                       | 2.629(19) | O(7)-Gd(1)-O(4)                                | 94.4(6)   |
| O(7)-Gd(1)-O(13)                 | 78.1(5)   | O(4)-Gd(1)-O(13)                               | 78.9(6)   |
| O(7)-Gd(1)-O(15) <sup>#1</sup>   | 93.2(6)   | O(4)-Gd(1)-O(15) <sup>#1</sup>                 | 147.6(6)  |
| O(13)-Gd(1)-O(15) <sup>#1</sup>  | 73.6(6)   | O(7)-Gd(1)-O(3W)                               | 147.7(5)  |
| O(4)-Gd(1)-O(3W)                 | 78.0(6)   | O(13)-Gd(1)-O(3W)                              | 69.6(6)   |
| O(15) <sup>#1</sup> -Gd(1)-O(3W) | 79.7(6)   | O(7)-Gd(1)-O(1W)                               | 79.1(5)   |
| O(4)-Gd(1)-O(1W)                 | 75.0(5)   | O(13)-Gd(1)-O(1W)                              | 143.7(6)  |
| O(15) <sup>#1</sup> -Gd(1)-O(1W) | 135.7(5)  | O(3W)-Gd(1)-O(1W)                              | 127.3(6)  |
| O(7)-Gd(1)-O(2W)                 | 140.2(5)  | O(4)-Gd(1)-O(2W)                               | 108.7(5)  |
| O(13)-Gd(1)-O(2W)                | 136.8(5)  | O(15) <sup>#1</sup> -Gd(1)-O(2W)               | 83.2(6)   |
| O(3W)-Gd(1)-O(2W)                | 70.8(6)   | O(1W)-Gd(1)-O(2W)                              | 76.4(5)   |
| O(7)-Gd(1)-O(16) <sup>#1</sup>   | 78.3(5)   | O(4)-Gd(1)-O(16) <sup>#1</sup>                 | 157.3(5)  |
| O(13)-Gd(1)-O(16) <sup>#1</sup>  | 119.7(5)  | O(15) <sup>#1</sup> -Gd(1)-O(16) <sup>#1</sup> | 53.4(5)   |
| O(3W)-Gd(1)-O(16) <sup>#1</sup>  | 119.3(6)  | O(1W)-Gd(1)-O(16) <sup>#1</sup>                | 82.4(5)   |
| O(2W)-Gd(1)-O(16) <sup>#1</sup>  | 67.8(5)   | O(20) <sup>#2</sup> -Gd(2)-O(14) <sup>#3</sup> | 84.8(6)   |
| O(20) <sup>#2</sup> -Gd(2)-O(1)  | 75.0(6)   | O(14) <sup>#3</sup> -Gd(2)-O(1)                | 131.5(5)  |
| O(20) <sup>#2</sup> -Gd(2)-O(4W) | 78.2(6)   | O(14) <sup>#3</sup> -Gd(2)-O(4W)               | 145.7(5)  |
| O(1)-Gd(2)-O(4W)                 | 72.1(6)   | O(20) <sup>#2</sup> -Gd(2)-O(5W)               | 137.2(5)  |
| O(14) <sup>#3</sup> -Gd(2)-O(5W) | 104.6(6)  | O(1)-Gd(2)-O(5W)                               | 120.3(5)  |
| O(4W)-Gd(2)-O(5W)                | 70.9(6)   | O(20) <sup>#2</sup> -Gd(2)-O(6W)               | 148.5(6)  |
| O(14) <sup>#3</sup> -Gd(2)-O(6W) | 71.5(6)   | O(1)-Gd(2)-O(6W)                               | 105.4(6)  |
| O(4W)-Gd(2)-O(6W)                | 132.6(6)  | O(5W)-Gd(2)-O(6W)                              | 70.7(5)   |
| O(20) <sup>#2</sup> -Gd(2)-O(7W) | 74.6(5)   | O(14) <sup>#3</sup> -Gd(2)-O(6W)               | 71.5(6)   |
| O(1)-Gd(2)-O(6W)                 | 105.4(6)  | O(4W)-Gd(2)-O(6W)                              | 132.6(6)  |
| O(5W)-Gd(2)-O(6W)                | 70.7(5)   | O(20) <sup>#2</sup> -Gd(2)-O(7W)               | 74.6(5)   |
| O(14) <sup>#3</sup> -Gd(2)-O(7W) | 67.3(5)   | O(1)-Gd(2)-O(7W)                               | 141.8(6)  |
| O(4W)-Gd(2)-O(7W)                | 79.4(5)   | O(5W)-Gd(2)-O(7W)                              | 71.2(5)   |
| O(6W)-Gd(2)-O(7W)                | 112.7(6)  | O(20) <sup>#2</sup> -Gd(2)-O(17) <sup>#3</sup> | 77.9(5)   |

|                                                |          |                                 |          |
|------------------------------------------------|----------|---------------------------------|----------|
| O(14) <sup>#3</sup> -Gd(2)-O(17) <sup>#3</sup> | 62.1(5)  | O(1)-Gd(2)-O(17) <sup>#3</sup>  | 70.7(5)  |
| O(4W)-Gd(2)-O(17) <sup>#3</sup>                | 139.8(5) | O(5W)-Gd(2)-O(17) <sup>#3</sup> | 143.5(5) |
| O(6W)-Gd(2)-O(17) <sup>#3</sup>                | 72.8(5)  | O(7W)-Gd(2)-O(17) <sup>#3</sup> | 123.8(4) |
| O(20) <sup>#2</sup> -Gd(2)-O(2)                | 125.9(6) | O(14) <sup>#3</sup> -Gd(2)-O(2) | 137.5(6) |
| O(1)-Gd(2)-O(2)                                | 52.3(5)  | O(4W)-Gd(2)-O(2)                | 75.3(5)  |
| O(5W)-Gd(2)-O(2)                               | 73.9(5)  | O(6W)-Gd(2)-O(2)                | 68.1(6)  |
| O(7W)-Gd(2)-O(2)                               | 142.0(5) | O(17) <sup>#3</sup> -Gd(2)-O(2) | 93.4(5)  |

Symmetry transformations used to generate equivalent atoms: <sup>#1</sup>  $-x-1, -y+1, -z+1$ ; <sup>#2</sup>  $x+1, y-1, z$ ; <sup>#3</sup>  $x+1, y, z$ .
